# Supplementary material for: VRK1 Kinase Activity Modulating Histone H4K16 Acetylation Inhibited by SIRT2 and VRK-IN-1
Source: MDPI journal article supplement (doi:10.3390/ijms24054912), 2023-03-03
Supplement: s1 [file s1]

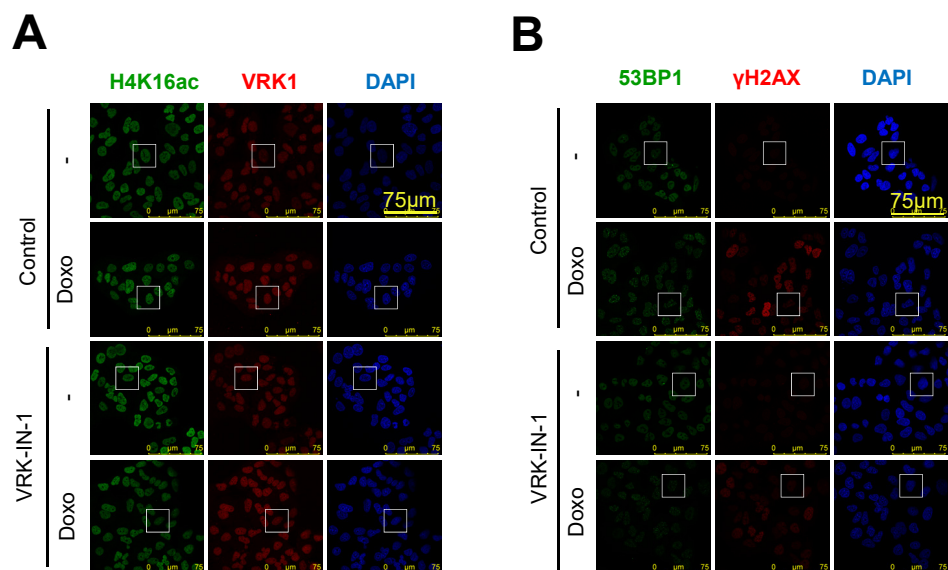

**Figure S4.** Effect of the VRK-IN-1 inhibitor on the level of H4K16ac (**A**) and 53BP1 foci (**B**) induced in the response to doxorubicin treatment. The boxed cells and the quantification are shown in Figure 7.
