# Supplementary material for: VRK1 Kinase Activity Modulating Histone H4K16 Acetylation Inhibited by SIRT2 and VRK-IN-1
Source: MDPI journal article supplement (doi:10.3390/ijms24054912), 2023-03-03
Supplement: s1 [file s1]

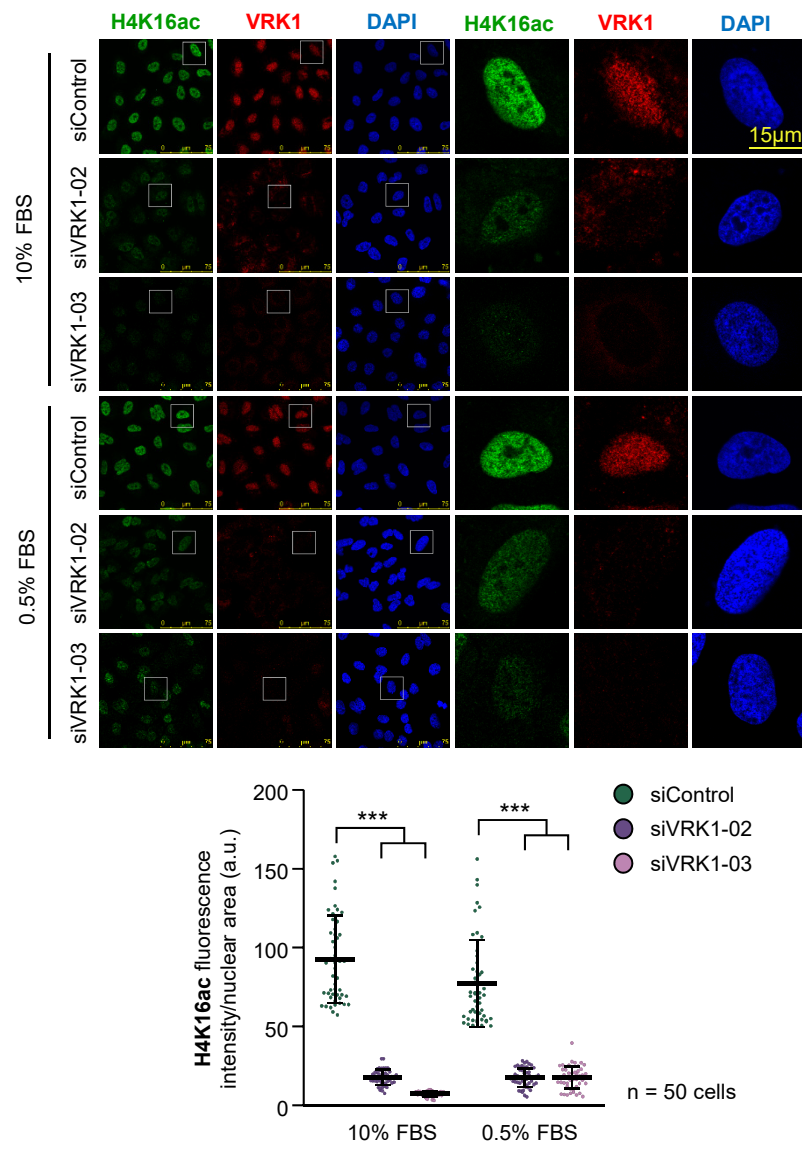

**Figure S1.** Effect of VRK1 depletion on the levels of H4K16ac induced by doxorubicin treatment. The experiment was performed either in the presence of 10 % serum, or in serum deprived cells (0.5%). The effect of VRK1 depletion was determined using two different siRNA independently. \*\*\* P < 0.001
