# Supplementary material for: VRK1 Kinase Activity Modulating Histone H4K16 Acetylation Inhibited by SIRT2 and VRK-IN-1
Source: MDPI journal article supplement (doi:10.3390/ijms24054912), 2023-03-03
Supplement: s1 [file s1]

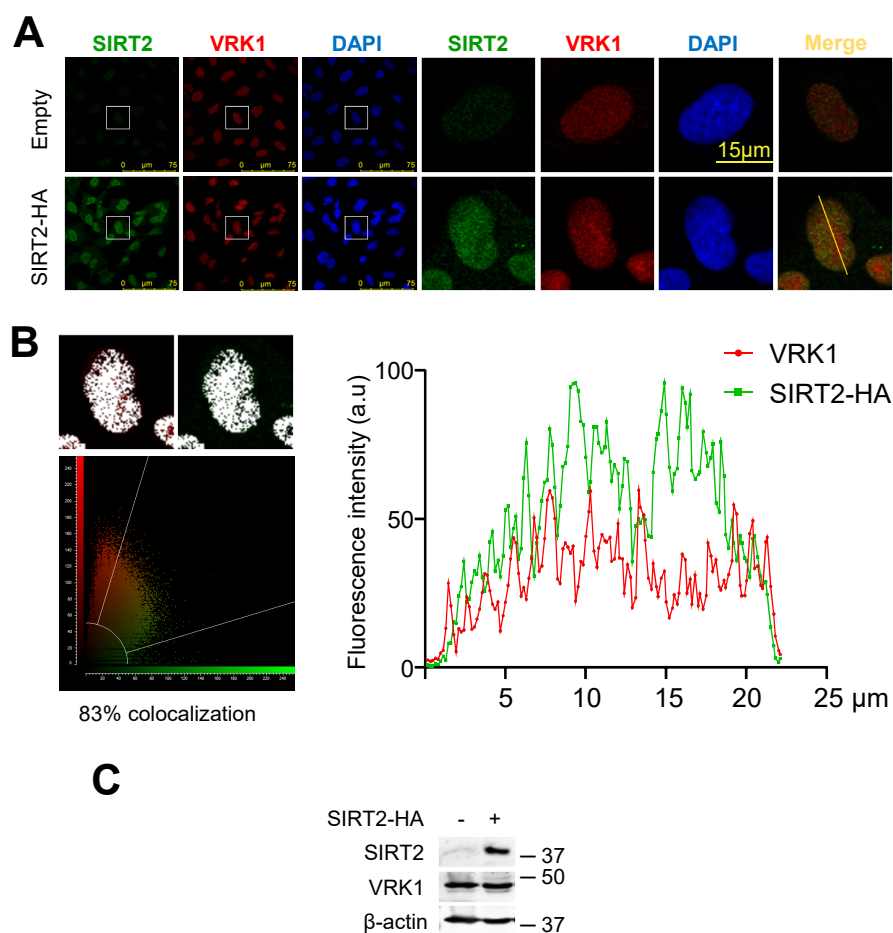

**Figure S3. Nuclear colocalization of VRK1 and SIRT2 proteins.** **A.** Colocalization of endogenous VRK1 and transfected SIRT2-HA in A549 cells. Field images are shown to the left. The selected individual cell to show detail is marked by a box and shown to the right. **B.** Overlap of the the immunofluorescence signals of VRK1 (red) and SIRT2 (green) along the plane (line) indicated in the merge image at the right. **C.** Immunoblot showing the expression of VRK1 and SIRT2.
